# Supplementary material for: Mouse Oocyte Methylomes at Base Resolution Reveal Genome-Wide Accumulation of Non-CpG Methylation and Role of DNA Methyltransferases
Source: PubMed Central journal article supplement (PMC3630097; doi:10.1371/journal.pgen.1003439), 2013-04-18
Supplement: pgen.1003439.s010.pdf [file pgen.1003439.s010.pdf]

**Table S1.** CG and non-CG methylation profiles in 15 ICRs

| ICR                        | Chr. | Start*      | End         | GVO                |                        | Dnmt3a-KO          |                        | Dnmt3L-KO          |                        | NGO                |                        |  |
|----------------------------|------|-------------|-------------|--------------------|------------------------|--------------------|------------------------|--------------------|------------------------|--------------------|------------------------|--|
|                            |      |             |             | CG methylation (%) | Non-CG methylation (%) | CG methylation (%) | Non-CG methylation (%) | CG methylation (%) | Non-CG methylation (%) | CG methylation (%) | Non-CG methylation (%) |  |
| Maternally methylated ICRs |      |             |             |                    |                        |                    |                        |                    |                        |                    |                        |  |
| <i>Nespas-Gnasx1</i>       | 2    | 174,119,863 | 174,126,564 | 95.8               | 5.8                    | 9.0                | 0.8                    | 6.3                | 0.6                    | 3.1                | 1.0                    |  |
| <i>Gnas1A</i>              | 2    | 174,150,877 | 174,154,638 | 91.7               | 4.5                    | 5.5                | 1.0                    | 0.5                | 0.6                    | 0.7                | 0.7                    |  |
| <i>Peg10</i>               | 6    | 4,696,743   | 4,699,483   | 93.8               | 4.9                    | 22.9               | 0.2                    | 20.7               | 0.7                    | 19.3               | 0.4                    |  |
| <i>Mest</i>                | 6    | 30,684,932  | 30,689,966  | 93.4               | 3.8                    | 17.4               | 0.8                    | 11.5               | 0.3                    | 9.2                | 0.9                    |  |
| <i>Peg3</i>                | 7    | 6,679,787   | 6,684,257   | 96.6               | 6.5                    | 19.2               | 1.1                    | 18.3               | 0.4                    | 5.5                | 0.7                    |  |
| <i>Snrpn</i>               | 7    | 67,147,381  | 67,151,583  | 95.9               | 7.5                    | 21.5               | 0.8                    | 12.1               | 0.2                    | 9.6                | 0.5                    |  |
| <i>Kcnq1ot1</i>            | 7    | 150,480,736 | 150,482,810 | 97.8               | 8.1                    | 4.6                | 1.1                    | 4.3                | 0.3                    | 2.6                | 0.5                    |  |
| <i>Zac1</i>                | 10   | 12,809,697  | 12,812,131  | 97.0               | 4.7                    | 6.0                | 0.6                    | 3.3                | 0.4                    | 0.6                | 0.5                    |  |
| <i>Grb10</i>               | 11   | 11,925,127  | 11,927,100  | 95.7               | 7.7                    | 11.9               | 0.6                    | 9.4                | 0.3                    | 4.5                | 0.7                    |  |
| <i>U2af1-rs1</i>           | 11   | 22,871,610  | 22,874,212  | 90.0               | 7.2                    | 15.5               | 1.4                    | 6.4                | 0.3                    | 4.8                | 0.6                    |  |
| <i>Igf2r</i>               | 17   | 12,934,169  | 12,935,816  | 97.4               | 7.6                    | 11.9               | 1.1                    | 1.4                | 0.6                    | 0.8                | 0.4                    |  |
| <i>Impact</i>              | 18   | 13,130,435  | 13,133,510  | 97.1               | 6.1                    | 7.8                | 0.6                    | 14.0               | 0.3                    | 16.5               | 0.3                    |  |
| Paternally methylated ICRs |      |             |             |                    |                        |                    |                        |                    |                        |                    |                        |  |
| <i>H19</i>                 | 7    | 149,764,673 | 149,771,930 | 1.0                | 0.5                    | 2.4                | 0.4                    | 1.5                | 0.3                    | 1.1                | 0.6                    |  |
| <i>Rasgrf1</i>             | 9    | 89,767,090  | 89,775,128  | 4.7                | 0.6                    | 1.7                | 0.4                    | 1.4                | 0.3                    | 1.5                | 0.4                    |  |
| <i>Dlk1-Gtl2</i>           | 12   | 110,762,703 | 110,773,093 | 4.4                | 0.4                    | 5.2                | 0.4                    | 5.5                | 0.5                    | 0.9                | 0.6                    |  |

\* The genomic coordinates (mm9) of the 15 ICRs were extracted from our previous report. (Tomizawa *et al.*, 2011)
