# Supplementary material for: Mouse Oocyte Methylomes at Base Resolution Reveal Genome-Wide Accumulation of Non-CpG Methylation and Role of DNA Methyltransferases
Source: PubMed Central journal article supplement (PMC3630097; doi:10.1371/journal.pgen.1003439), 2013-04-18
Supplement: pgen.1003439.s011.pdf [file pgen.1003439.s011.pdf]

**Table S2.** Primers for bisulfite sequencing (bisulfite-PCR)

|                      | Forward primer                       | Reverse primer                           |
|----------------------|--------------------------------------|------------------------------------------|
| <i>Atp8b1</i> top    | 5'-AAGTTAGTTGTTGTATTAGAAGATTATTAT-3' | 5'-CTAACCTTATCTTTACATTAACAAAAA-3'        |
| <i>Atp8b1</i> bottom | 5'-TTGGTTTTGTTTTGTATTGAAGAG-3'       | 5'-ACATCAAAAAATTATCACAAAAATC-3'          |
| <i>Igf1r</i> top     | 5'-TGATTGGATATTTGATAAGATTATTTTGA-3'  | 5'-AAAAAATACAACATCCAACCAAAAA-3'          |
| <i>Igf1r</i> bottom  | 5'-ATTTTGGTGATTGAAAAGTTTATTG-3'      | 5'-CCAATTCATCATACTAATACTATATCTT-3'       |
| <i>Igf2r</i>         | 5'-GGGAATTGAGGTAAGTTAGGGTTTT-3'      | 5'-TCTTATAACCCAAAAATCTTCACCCTAAC-3'      |
| <i>H19</i>           | 5'-GTTTGAGGAGTTTTAAGGTAGAAGGGGATT-3' | 5'-TAACAAACTCATAAATCACTCAAACATAACATTC-3' |
